# Supplementary material for: miR-154-5p Is a Novel Endogenous Ligand for TLR7 Inducing Microglial Activation and Neuronal Injury
Source: MDPI journal article supplement (doi:10.3390/cells13050407), 2024-02-26
Supplement: s1 [file s1]

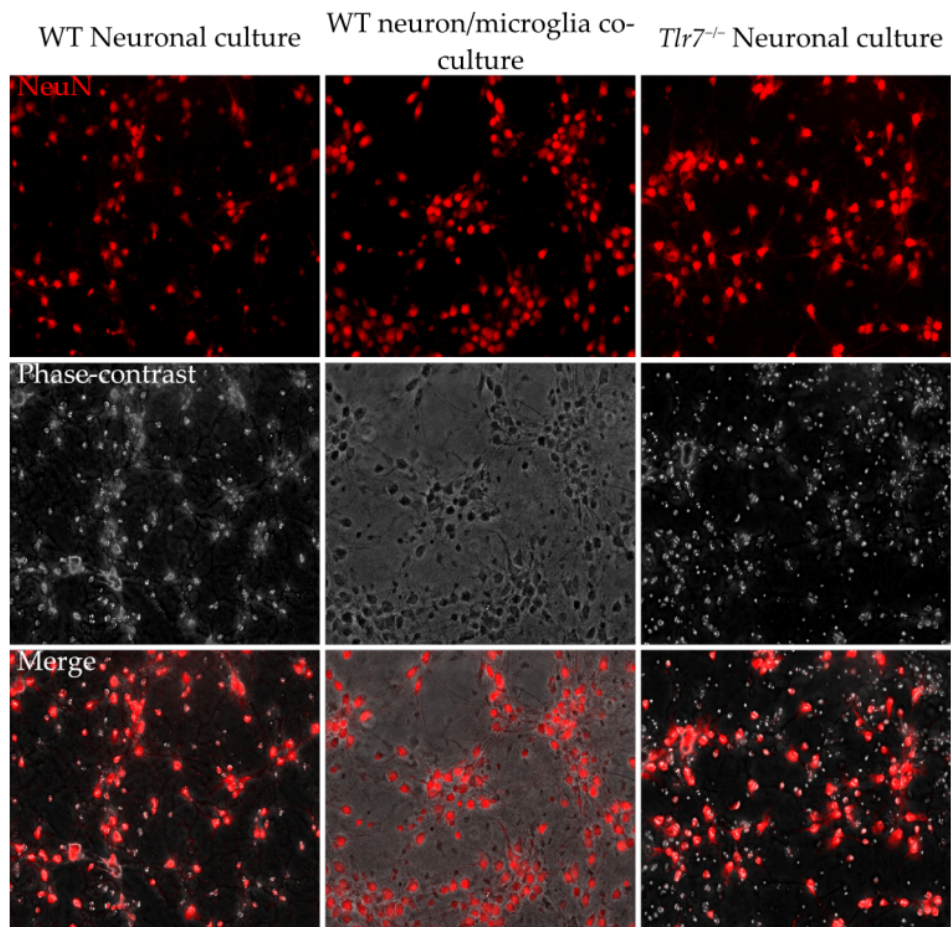

**Figure S1.** Representative images of enriched cortical neuron cultures and co-cultures containing neurons and microglia. Enriched cortical neuron cultures (wild-type, WT, C56BL/6 and *Tlr7*<sup>-/-</sup>) and WT co-cultures containing neurons and microglia were immunostained with NeuN (red fluorescence) or analyzed by phase-contrast microscopy, as indicated. 20× magnification.
